# Supplementary material for: Exploring the Y Chromosomal Ancestry of Modern Panamanians
Source: PLoS One. 2015 Dec 4;10(12):e0144223. doi: 10.1371/journal.pone.0144223 (PMC4670172; doi:10.1371/journal.pone.0144223)
Supplement: S4 Table — (XLSX) [file pone.0144223.s007.xlsx]

## Sheet: S4 Table
S4 Table. Population genetics parameters for the Panamanian samples with 33 and 15 Y-STR loci haplotypes.
33 STR loci per province	Sample size	Number of haplotypes	Unique haplotypes	Fraction of unique haplotypes	Discrimination capacity	Haplotype diversity ± SD	Gene diversitya ± SD	Reference
Bocas del Toro	28	25	23	92.00	89.29	0.9894 ± 0.0138	0.4418 ± 0.2270	Present study
Chiriquí	87	83	81	97.59	95.40	0.9981 ± 0.0024	0.5904 ± 0.2922	Present study
Coclé	19	19	19	100.00	100.00	1.0000 ± 0.0171	0.5963 ± 0.3085	Present study
Colón	8	7	6	85.71	87.50	0.9643 ± 0.0772	0.5140 ± 0.2921	Present study
Darién	7	7	7	100.00	100.00	1.0000 ± 0.0764	0.5367 ± 0.3117	Present study
Herrera	29	28	27	96.43	96.55	0.9975 ± 0.0099	0.6119 ± 0.3099	Present study
Kuna Yala	14	10	9	90.00	71.43	0.8901 ± 0.0807	0.3323 ± 0.1805	Present study
Los Santos	24	24	24	100.00	100.00	1.0000 ± 0.0120	0.6285 ± 0.3206	Present study
Miscellaneous	73	72	71	98.61	98.63	0.9996 ± 0.0024	0.6127 ± 0.3035	Present study
Panamá	31	30	29	96.67	96.77	0.9978 ± 0.0089	0.6232 ± 0.3147	Present study
Veraguas	24	24	24	100.00	100.00	1.0000 ± 0.0120	0.5782 ± 0.2958	Present study
15 STR loci per province
Bocas del Toro	28	22	20	90.91	78.57	0.9683 ± 0.0220	0.4910 ± 0.2636	Present study
Chiriquí	87	79	77	97.47	90.80	0.9952 ± 0.0037	0.6508 ± 0.3334	Present study
Coclé	19	18	17	94.44	94.74	0.9942 ± 0.0193	0.6440 ± 0.3452	Present study
Colón	8	7	6	85.71	87.50	0.9643 ± 0.0772	0.6000 ± 0.3525	Present study
Darién	7	7	7	100.00	100.00	1.0000 ± 0.0764	0.6191 ± 0.3714	Present study
Herrera	29	28	27	96.43	96.55	0.9975 ± 0.0099	0.6484 ± 0.3404	Present study
Kuna Yala	14	9	8	88.89	64.29	0.8352 ± 0.1008	0.3443 ± 0.1991	Present study
Los Santos	24	24	24	100.00	100.00	1.0000 ± 0.0120	0.6473 ± 0.3426	Present study
Miscellaneous	73	72	71	98.61	98.63	0.9996 ± 0.0024	0.6567 ± 0.3370	Present study
Panamá	31	30	29	96.67	96.77	0.9978 ± 0.0089	0.6725 ± 0.3514	Present study
Veraguas	24	24	24	100.00	100.00	1.0000 ± 0.0120	0.6348 ± 0.3364	Present study
15 STR loci per country
Panama Total sample	344	294	265	90.14	85.47	0.9982 ± 0.0006	0.6543 ± 0.3321	Present study
Argentina Colla	10	7	5	71.43	70.00	0.9111 ± 0.0773	0.4222 ± 0.2474	Toscanini et al., 2011
Argentina Toba	42	27	20	74.07	64.29	0.9686 ± 0.0130	0.3612 ± 0.1972	Toscanini et al., 2011
Bolivia Aymaras	57	39	29	74.36	68.42	0.9793 ± 0.0088	0.4277 ± 0.2280	Gayà-Vidal et al., 2011
Bolivia Quechuas	43	28	22	78.57	65.12	0.9623 ± 0.0158	0.3939 ± 0.2130	Gayà-Vidal et al., 2011
Colombia	306	281	258	91.81	91.83	0.9994 ± 0.0003	0.6516 ± 0.3310	Julieta Ávila et al., 2009
Guatemala Maya	220	199	184	92.46	90.45	0.9985 ± 0.0008	0.5980 ± 0.3059	Martínez-González et al., 2012
Nicaragua	162	153	145	94.77	94.44	0.9992 ± 0.0008	0.6404 ± 0.3266	Núñez et al., 2012
Mexico	166	106	76	71.70	63.86	1.0000 ± 0.0007	0.4871 ± 0.2536	Sandoval et al., 2012
(a) Nei's unbiased gene diversity calculated according to Nei 1987.
Reference
Gayà-Vidal M, Moral P, Saenz-Ruales N, Gerbault P, Tonasso L, Villena M, et al. mtDNA and Y-chromosome diversity in Aymaras and Quechuas from Bolivia: different stories and special genetic traits of the Andean Altiplano populations. Am J Phys Anthropol. 2011;145:215-230.
Julieta Avila S, Briceño I, Gómez A. Genetic population analysis of 17 Y-chromosomal STRs in three states (Valle del Cauca, Cauca and Nariño) from Southwestern Colombia. J Forensic Leg Med. 2009;16:204-211.
Martínez-González LJ, Saiz M, Alvarez-Cubero MJ, Gómez-Martín A, Alvarez JC, Martínez-Labarga C, et al. Distribution of Y chromosomal STRs loci in Mayan and Mestizo populations from Guatemala. Forensic Sci Int Gen. 2012;6:136-142.
Nei M. Molecular Evolutionary Genetics: Columbia University Press; 1987.
Núñez C, Geppert M, Baeta M, Roewer L, Martínez-Jarreta B. Y chromosome haplogroup diversity in a Mestizo population of Nicaragua. Forensic Sci Int Gen. 2012;6:e192-195.
Sandoval K, Moreno-Estrada A, Mendizabal I, Underhill PA, Lopez-Valenzuela M, Peñaloza-Espinosa R, et al. Y-chromosome diversity in Native Mexicans reveals continental transition of genetic structure in the Americas. Am J Phys Anthropol. 2012;148:395-405.
Toscanini U, Gusmão L, Berardi G, Gomes V, Amorim A, Salas A, et al. Male lineages in South American Native groups: evidence of M19 traveling south. Am J Phys Anthropol. 2011;146:188-196.
